# Supplementary material for: Multigene phylogeny of the scyphozoan jellyfish family Pelagiidae reveals that the common U.S. Atlantic sea nettle comprises two distinct species (Chrysaora quinquecirrha and C. chesapeakei)
Source: PubMed Central journal article supplement (PMC5642265; doi:10.7717/peerj.3863), 2017-10-13

A.

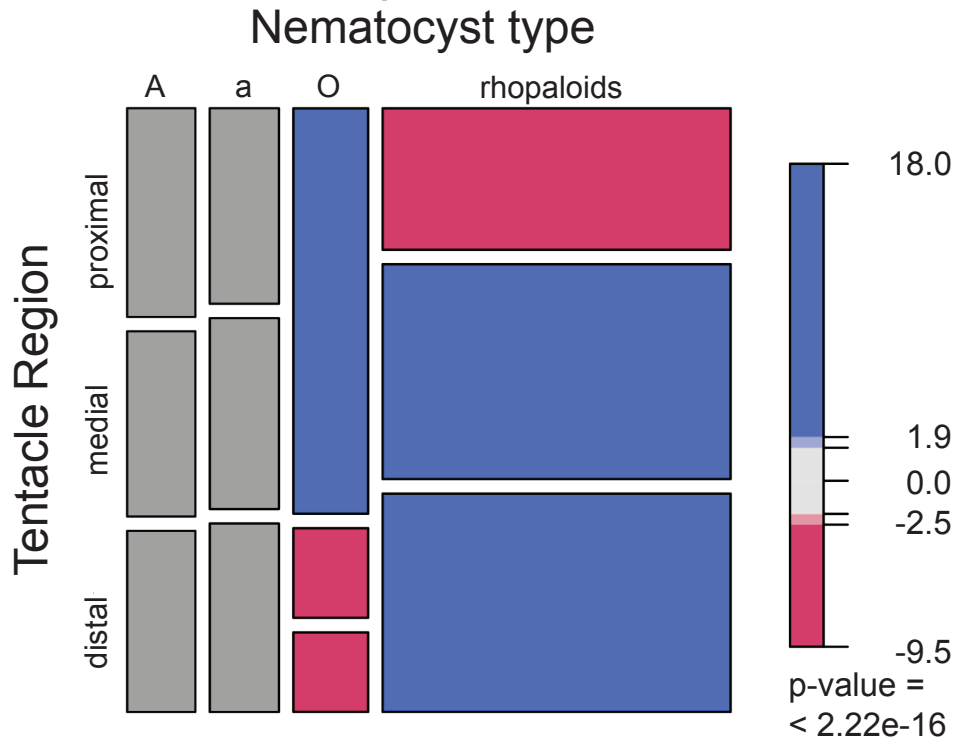

B.

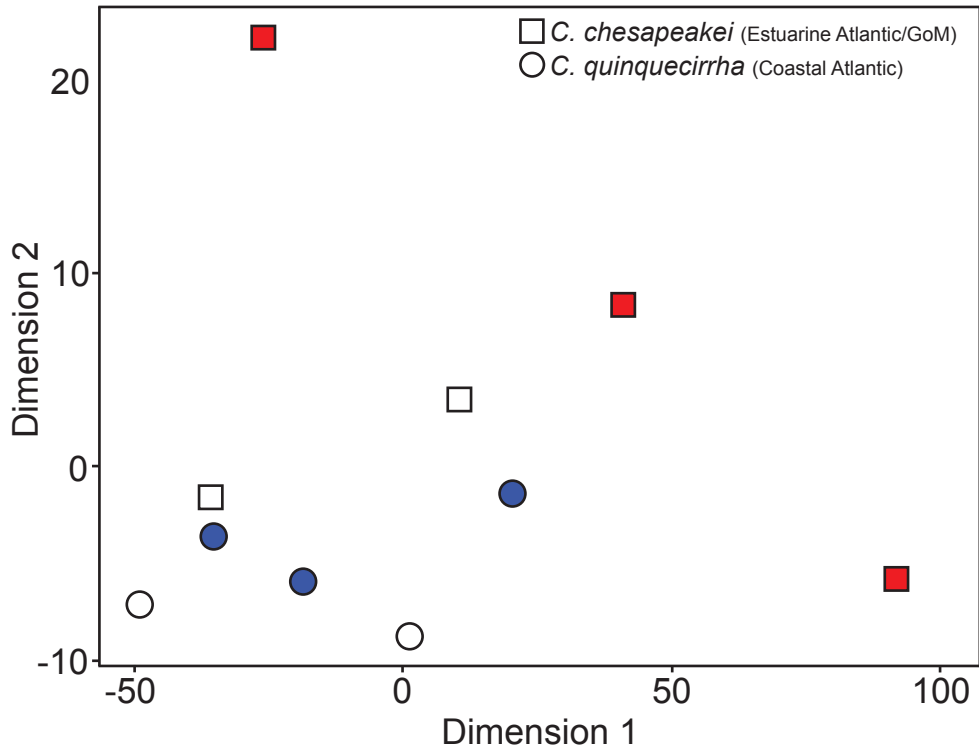

Supplement: peerj-05-3863-s008.pdf [file peerj-05-3863-s008.pdf]
